# Supplementary material for: Blue ordered/disordered Janus-type TiO2 nanoparticles for enhanced photocatalytic hydrogen generation
Source: Royal Society of Chemistry journal article supplement (doi:10.1039/d0ta06281b), 2020-01-01
Supplement: d0ta06281b1.pdf [file d0ta06281b1.pdf]

## Supplementary Materials

### **Blue Order/Disorder Janus-Type TiO<sub>2</sub> Nanoparticles for Enhanced Photocatalytic Hydrogen Generation**

*Liangsheng Hu,<sup>a</sup> Yong Li,<sup>a</sup> Weiran Zheng,<sup>a</sup> Yung-Kang Peng,<sup>b</sup> Shik Chi Edman Tsang,<sup>b</sup> Lawrence Yoon Suk Lee,<sup>a,\*</sup> and Kwok-Yin Wong<sup>a,\*</sup>*

<sup>a</sup> Department of Applied Biology and Chemical Technology and State Key Laboratory of Chemical Biology and Drug Discovery, The Hong Kong Polytechnic University, Hung Hom, Kowloon, Hong Kong SAR, China

<sup>b</sup> Wolfson Catalysis Centre, Department of Chemistry, University of Oxford, Oxford, OX1 3QR, UK

**\*Corresponding Authors:** lawrence.ys.lee@polyu.edu.hk (L. Y. S. Lee);

kwok-yin.wong@polyu.edu.hk (K.-Y. Wong)

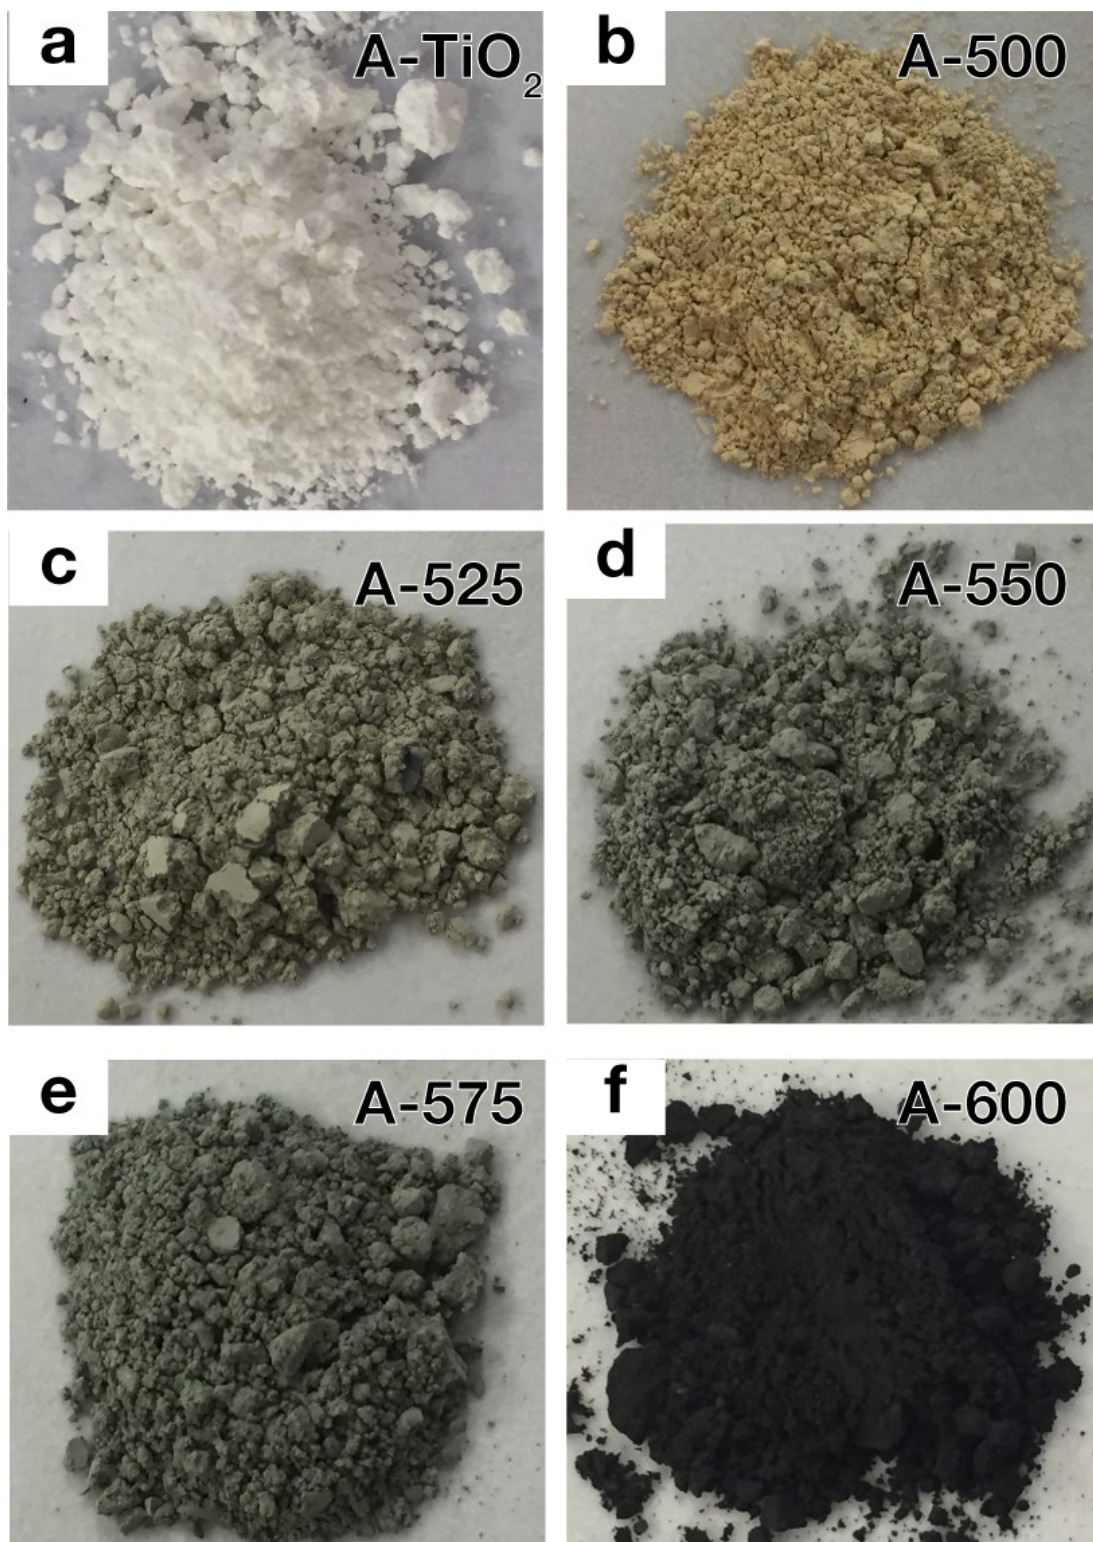

**Fig. S1.** Digital photos of (a) pristine A-TiO<sub>2</sub> and the A-TiO<sub>2</sub> samples treated by magnesiothermic reduction (MTR) at (b) 500, (c) 525, (d) 550, (e) 575, and (f) 600 °C. The MTR reaction time was 30 min.

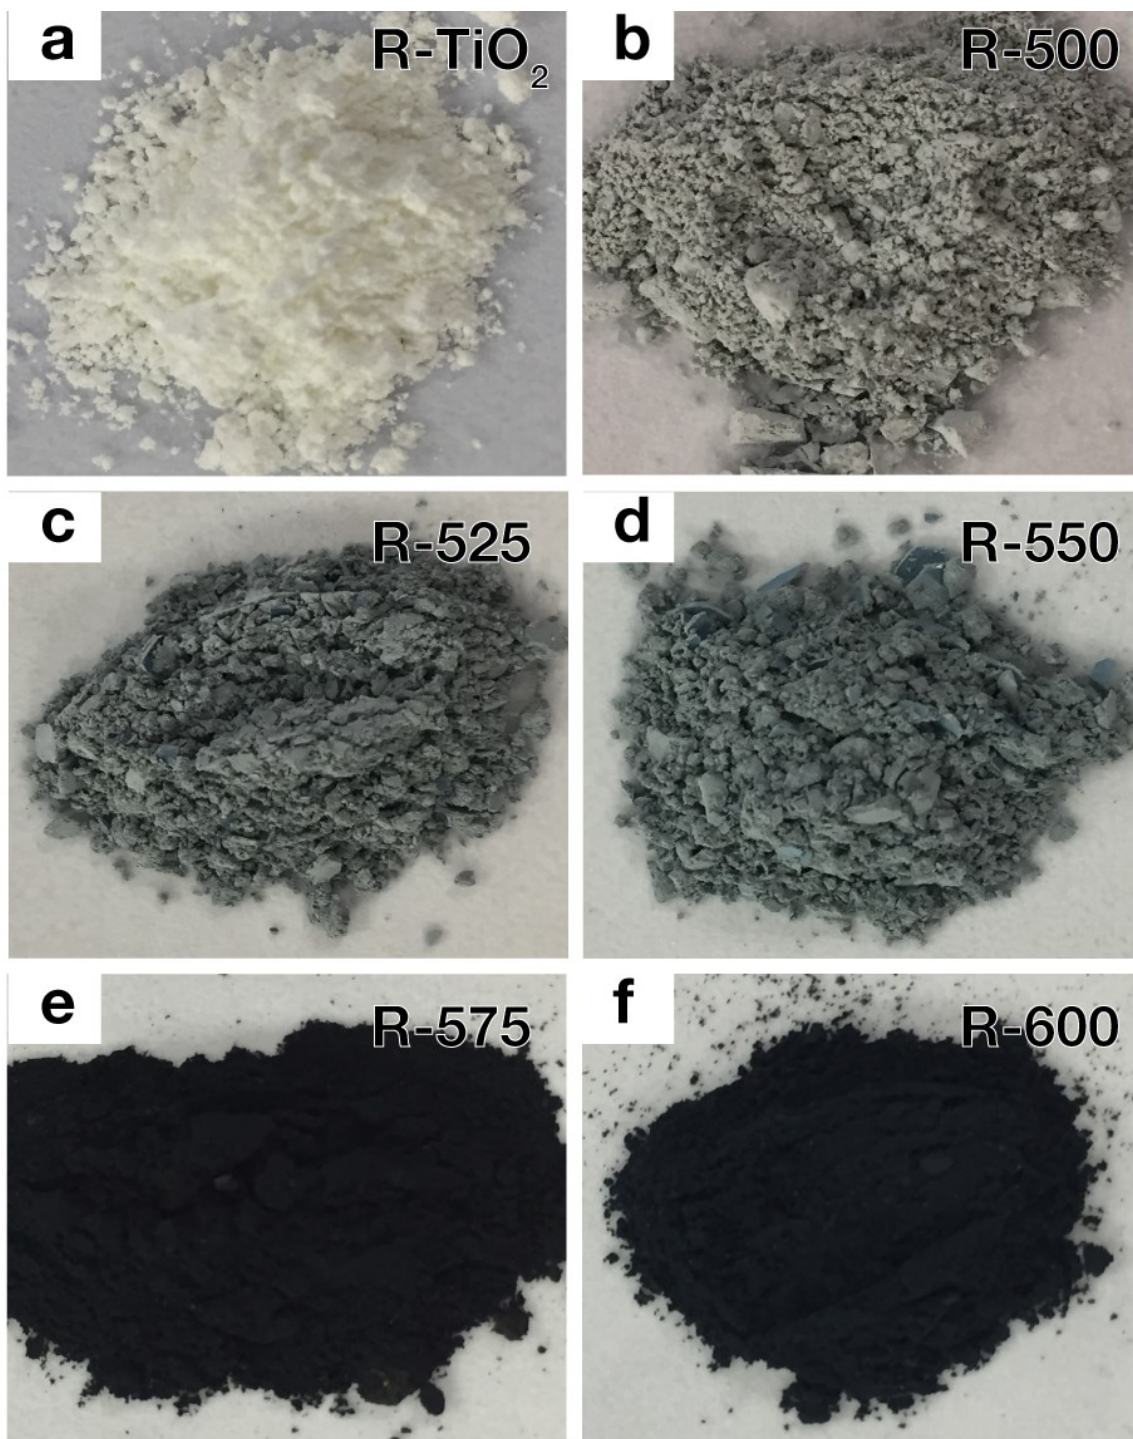

**Fig. S2.** Photographic images of (a) pristine R-TiO<sub>2</sub> and R-TiO<sub>2</sub> samples treated by magnesiothermic reduction at (b) 500, (c) 525, (d) 550, (e) 575, and (f) 600 °C. The reaction time was 30 min for all samples.

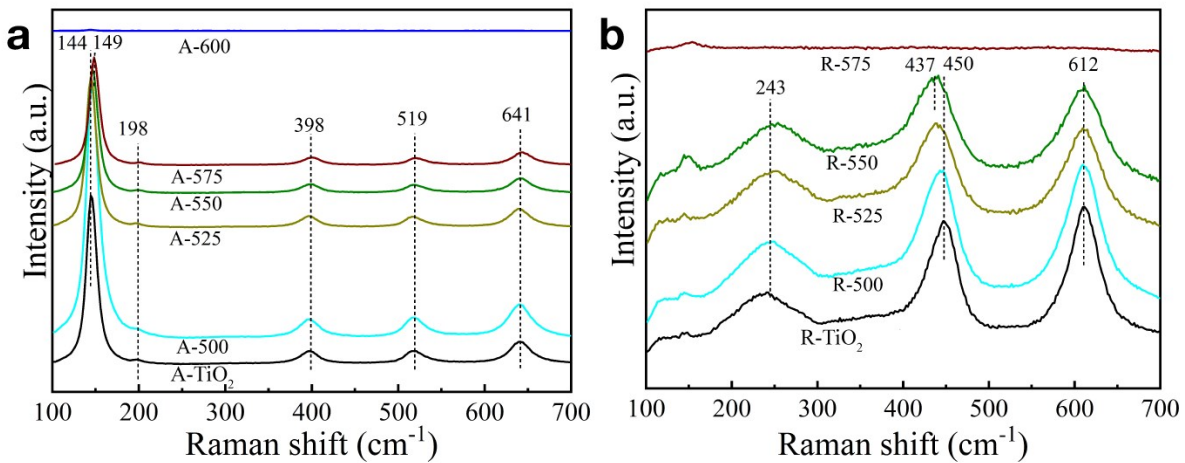

**Fig. S3.** Raman shifts of (a) untreated anatase TiO<sub>2</sub> and reduced A-TiO<sub>2</sub> samples from 500 °C to 600 °C and (b) untreated rutile TiO<sub>2</sub> and reduced A-TiO<sub>2</sub> samples from 500 °C to 575 °C.



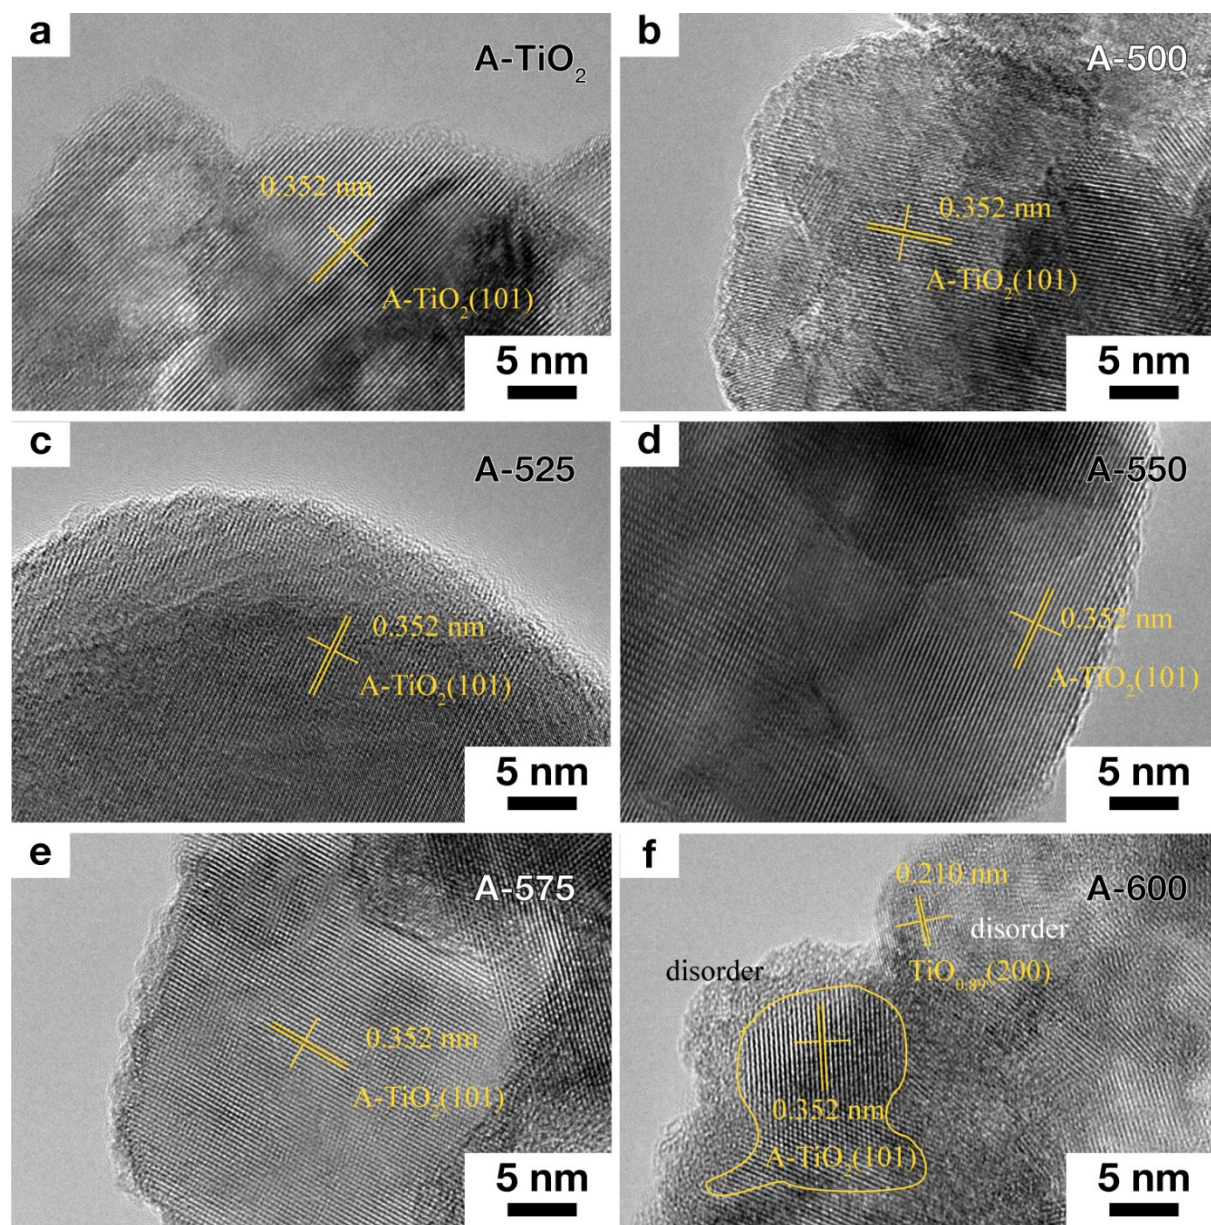

**Fig. S4.** HR-TEM images of (a) untreated anatase TiO<sub>2</sub> (A-Untreated) and (b-f) A-TiO<sub>2</sub> samples treated by magnesiothermic reduction at 500 to 600 °C for 30 min.



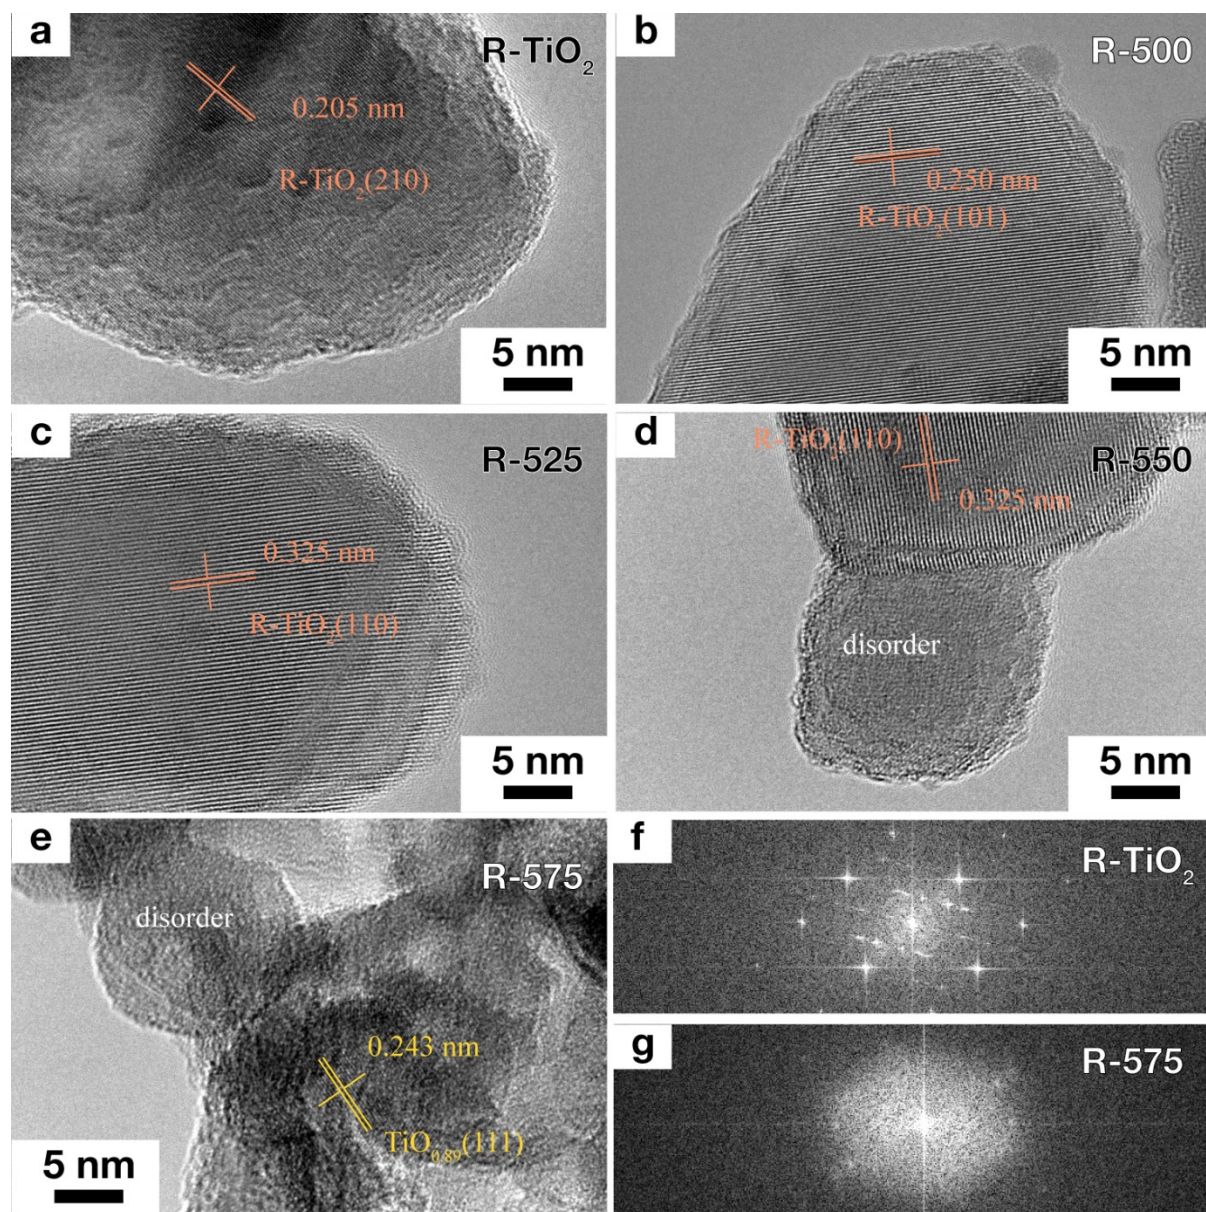

**Fig. S5.** (a-e) HR-TEM images of untreated rutile  $\text{TiO}_2$  (R-Untreated) and  $\text{R-TiO}_2$  samples treated by magnesiothermic reduction at 500 to 600 °C for 30 min. (f) and (g) are the fast Fourier transformation (FFT) images for (a) and (e), respectively.

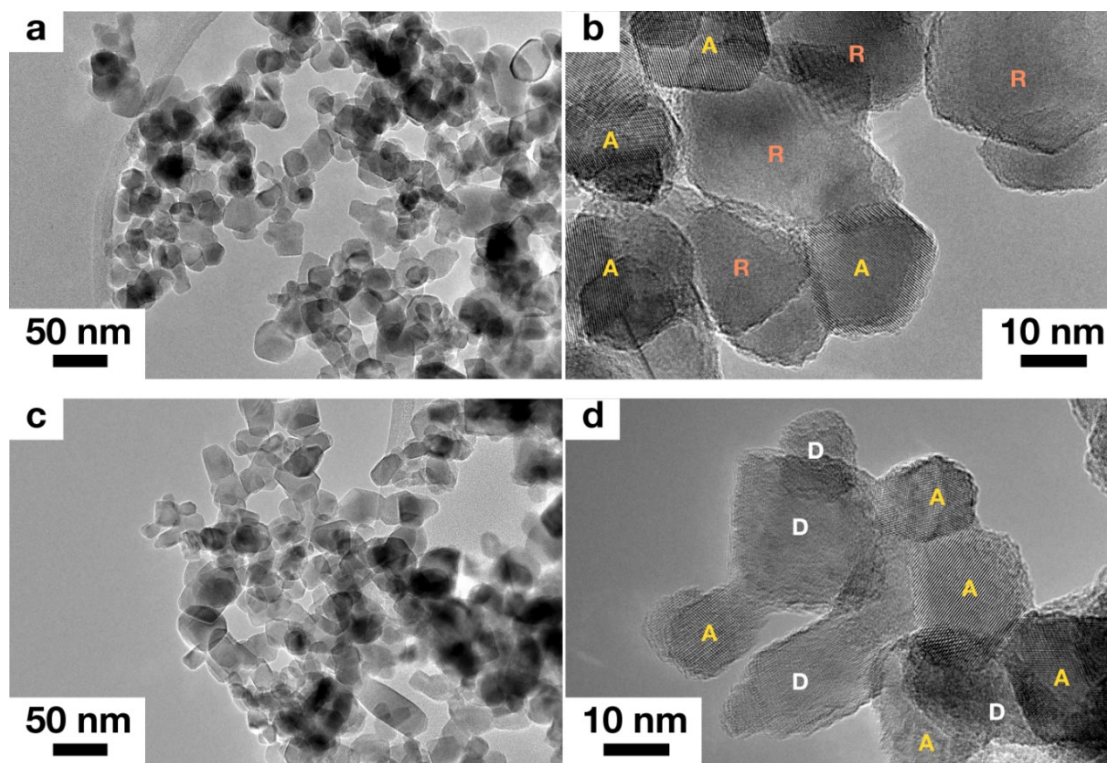

**Fig. S6.** Low- and high-magnification TEM images of (a-b) P25 and (c-d) B-P25  $\text{TiO}_2$  samples. A: Anatase  $\text{TiO}_2$ , R: Rutile  $\text{TiO}_2$ , D: disorder.

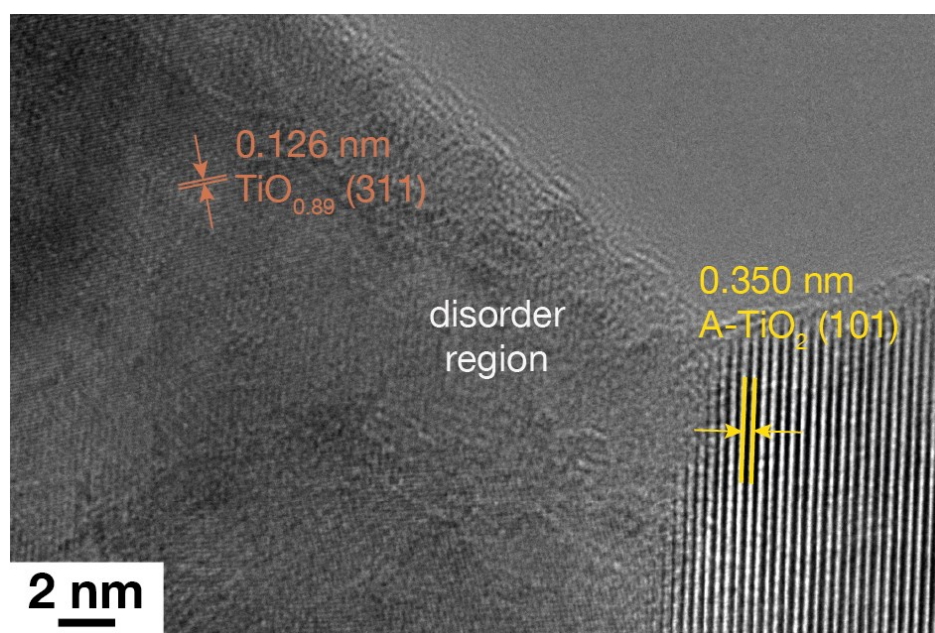

**Fig. S7.** High-resolution TEM image of B-P25  $\text{TiO}_2$  showing a larger area in the disordered

region.



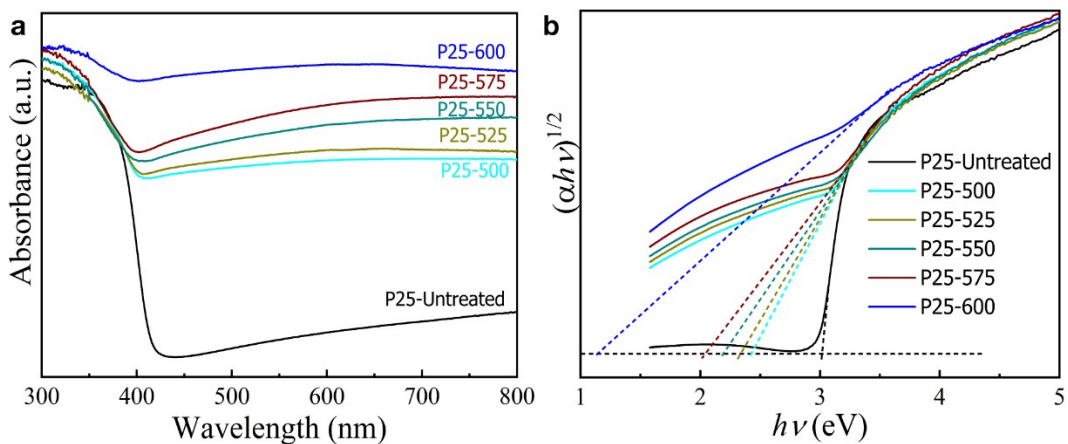

**Fig. S8.** (a) UV-Vis absorption spectra and (b) the corresponding Tauc plots of untreated P25 and treated P25 by MTR at 500 to 600 °C for 30 min.

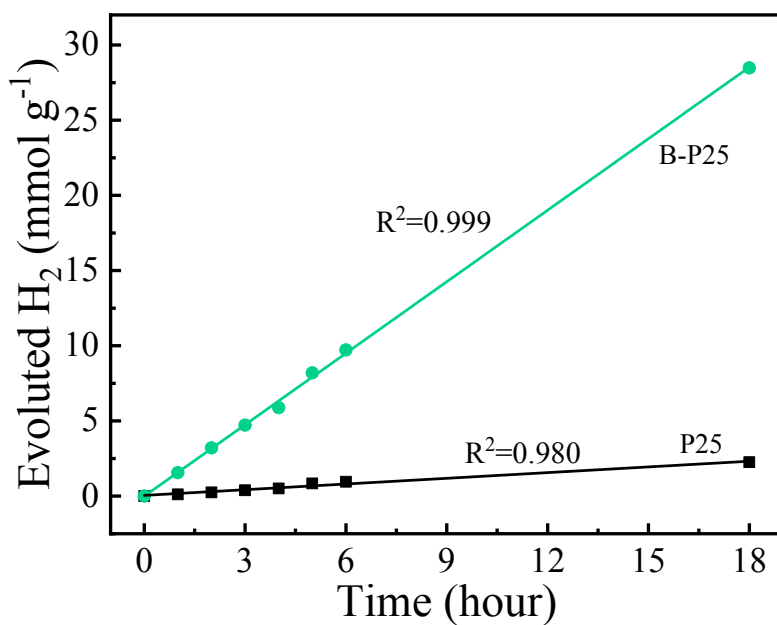

**Fig. S9.** Hydrogen production during a continuous 18-hour HER photocatalysis over P25 and B-P25.

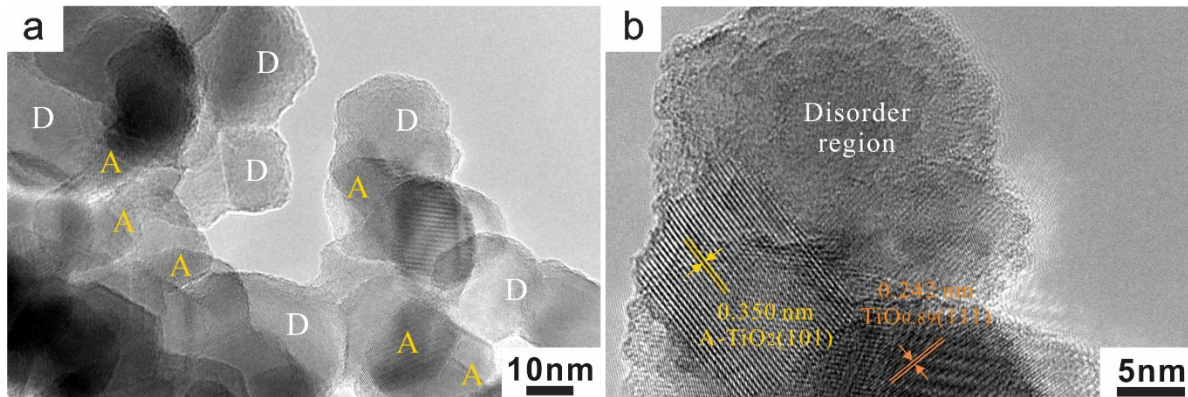

**Fig. S10.** Low- and high-magnification TEM images of B-P25 TiO<sub>2</sub> after the cyclic photocatalytic reactions.

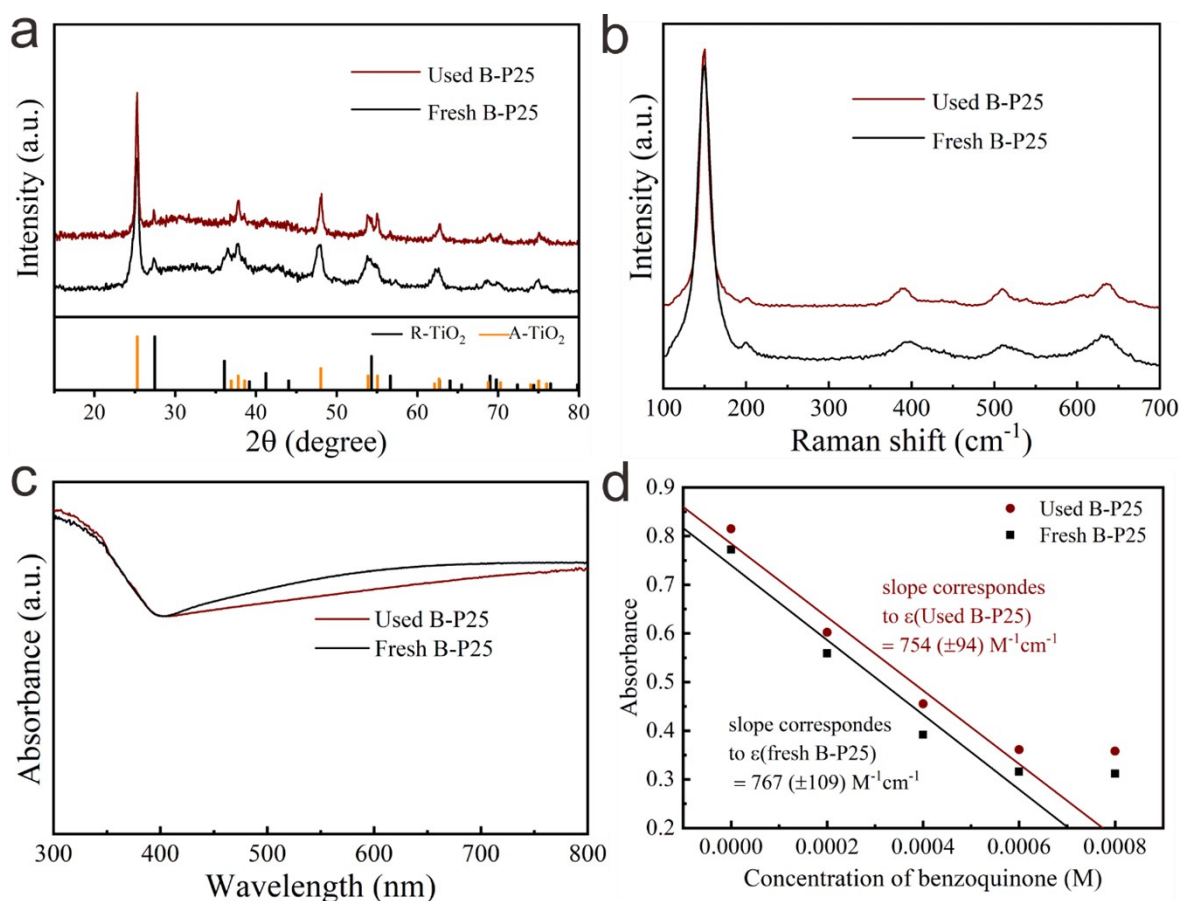

**Fig. S11.** Comparisons of (a) XRD patterns, (b) UV-Vis absorption spectra, (c) Raman spectra, and (d) extinction coefficients of B-P25 TiO<sub>2</sub> before (fresh) and after (used) the cyclic photocatalytic reactions.

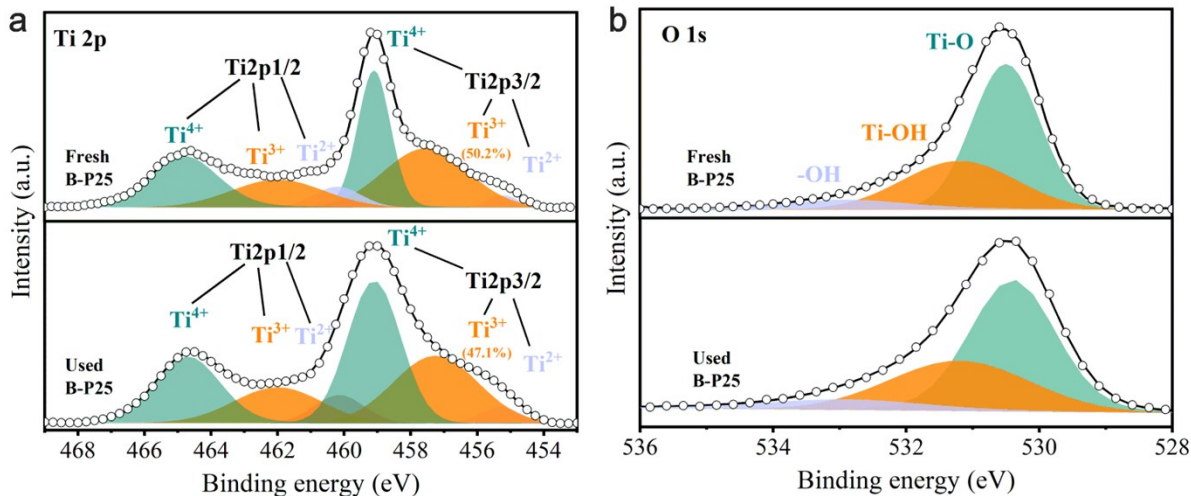

**Fig. S12.** Comparisons of high-resolution XPS (a) Ti 2p and (b) O 1s spectra of B-P25 TiO<sub>2</sub> before (fresh) and after (used) the cyclic photocatalytic reactions.

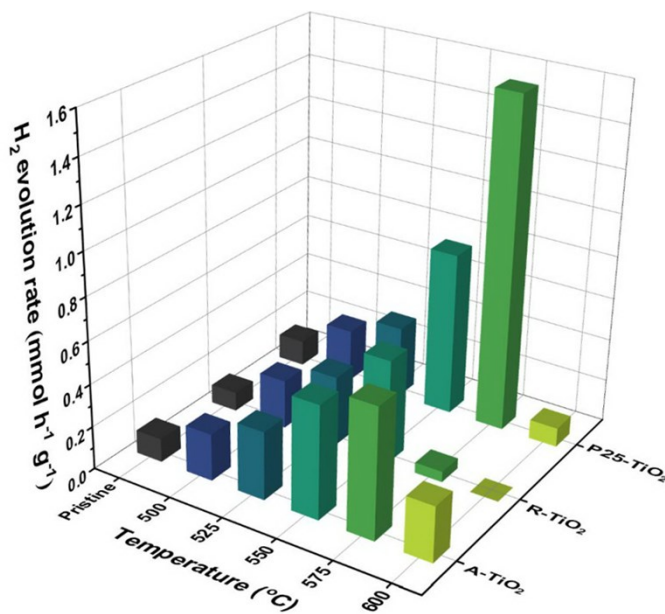

**Fig. S13.** Comparison of photocatalytic HER rates among A-TiO<sub>2</sub>, A-TiO<sub>2</sub>, P25-TiO<sub>2</sub>, and treated A-TiO<sub>2</sub>, A-TiO<sub>2</sub>, P25-TiO<sub>2</sub> samples.



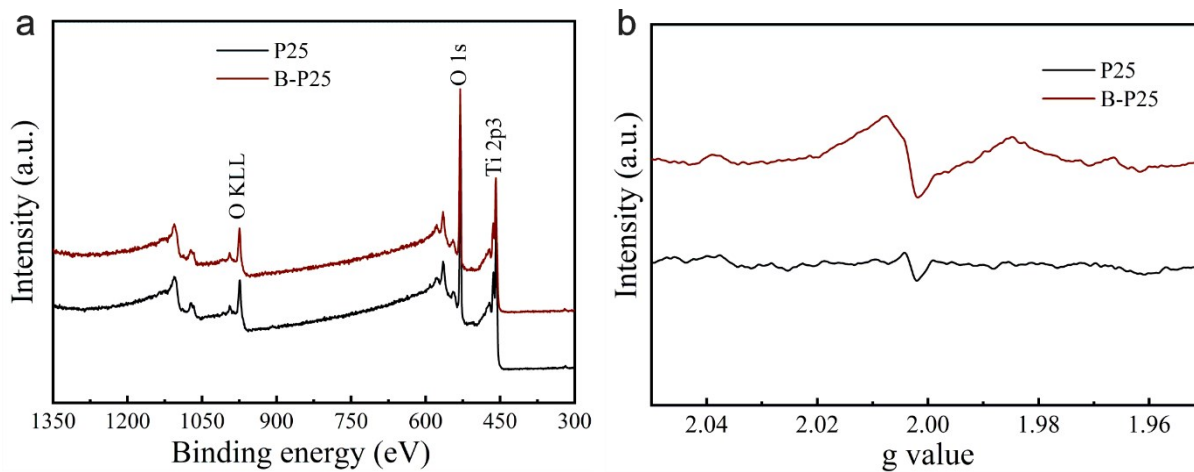

**Fig. S14.** (a) Full XPS survey and (b) solid-state EPR spectra of P25 and B-P25 recorded at 25 °C.

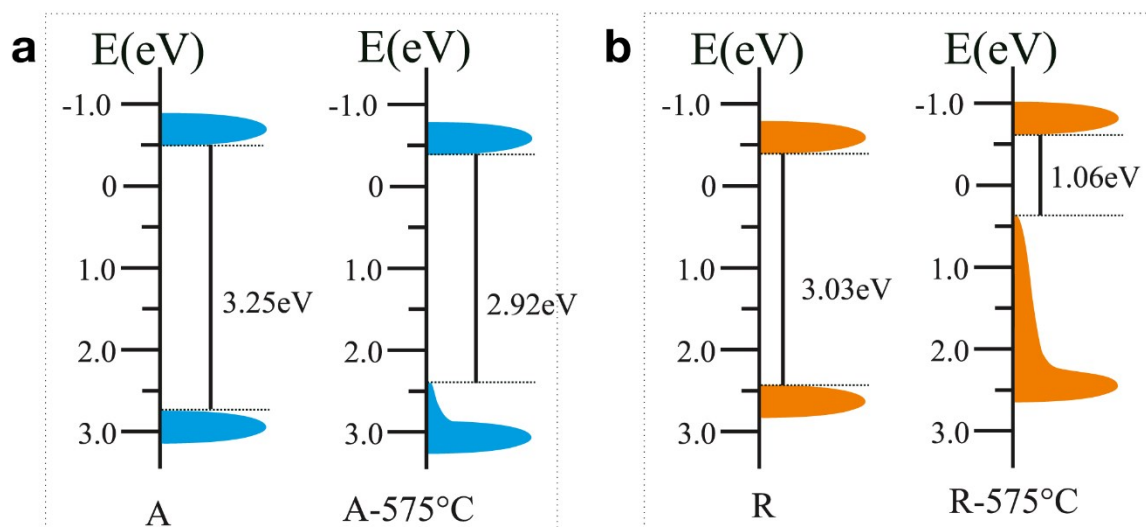

**Fig. S15.** Schematic illustrations of density of states (DOS) of (a) A-TiO<sub>2</sub> and A-575 and (b) R-TiO<sub>2</sub> and R-575.

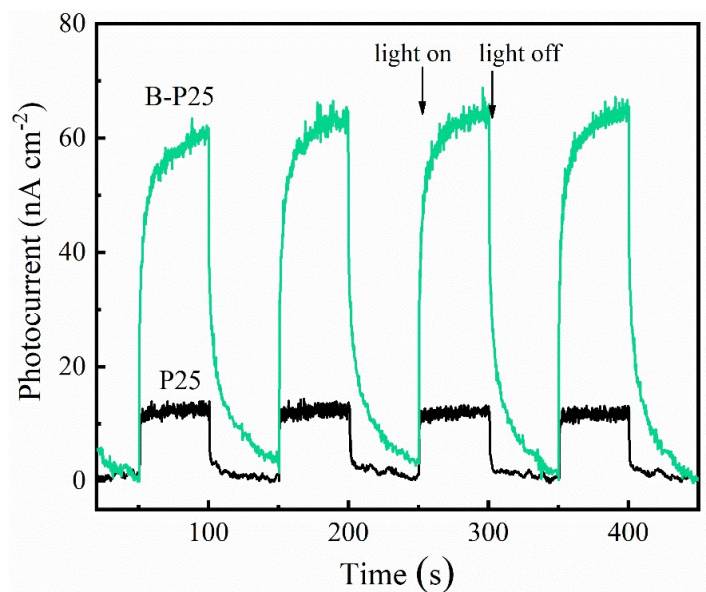

**Fig. S16.** Photocurrent response of P25 and B-P25 under visible light irradiation.

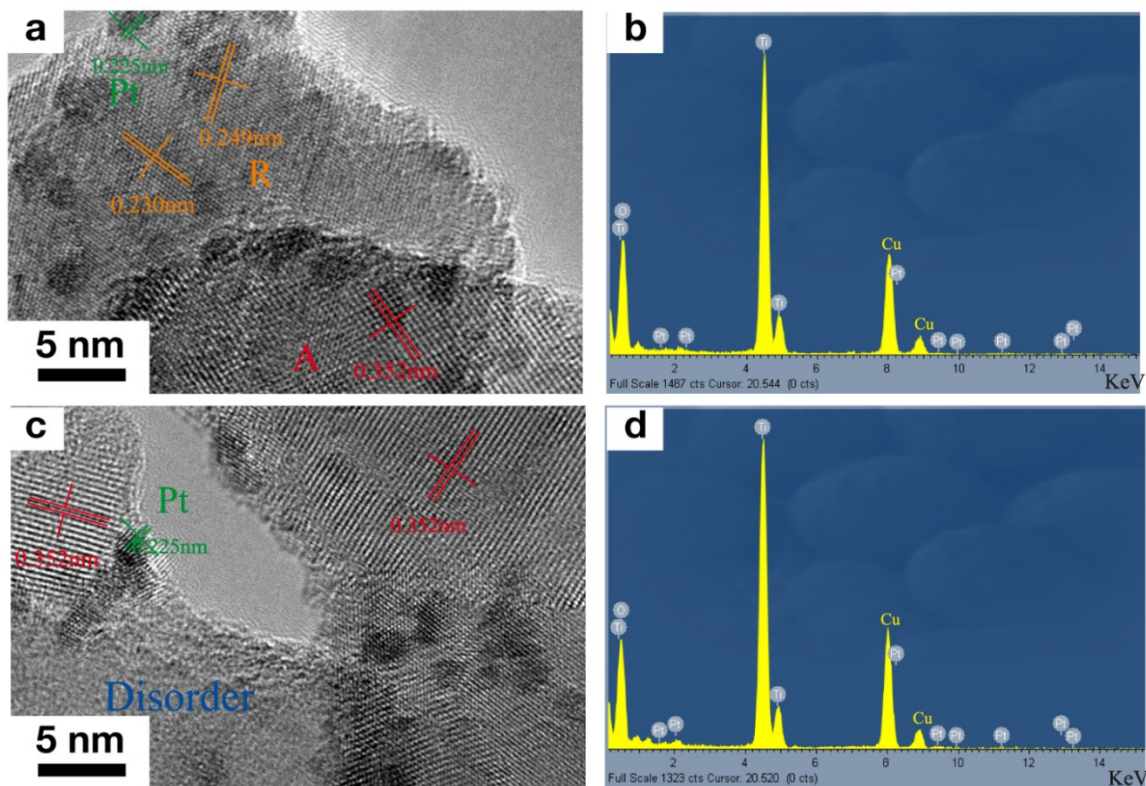

**Fig. S17** (a) HR-TEM image and (b) EDX spectrum of P25/Pt. (c) HR-TEM image and (d) EDX spectrum of B-P25/Pt.

**Table S1.** Comparison of HER rates of recently reported black TiO<sub>2</sub>-based photocatalysts.

| Photocatalyst                                      | Structure                      | Cocatalyst  | Light source                                       | HER rate<br>(mmol h <sup>-1</sup> g <sup>-1</sup> ) | Ref.             |                                      |       |
|----------------------------------------------------|--------------------------------|-------------|----------------------------------------------------|-----------------------------------------------------|------------------|--------------------------------------|-------|
| Hydrogenated anatase TiO <sub>2</sub>              | Core/shell                     | 0.5 wt.% Pt | 300 W Xe lamp, Visible light ( $\lambda > 420$ nm) | 0.064                                               | 1                |                                      |       |
| Hydrogenated N-doped anatase TiO <sub>2</sub>      | Core/shell                     | 0.5 wt.% Pt | 300 W Xe lamp, AM1.5                               | 1.5                                                 | 2                |                                      |       |
| NaBH <sub>4</sub> -reduced rutile TiO <sub>2</sub> | Core/shell                     | 0.2 wt.% Pt | 300 W Xe lamp                                      | 7.34                                                | 3                |                                      |       |
| NaBH <sub>4</sub> -reduced rutile TiO <sub>2</sub> | Core/shell                     | 1 wt.% Pt   | 300 W Xe lamp                                      | 0.11                                                | 4                |                                      |       |
|                                                    |                                |             | Visible light ( $\lambda > 420$ nm)                | 0.02                                                |                  |                                      |       |
| NaBH <sub>4</sub> reduced P-25                     | Core/shell                     | 1 wt.% Pt   | 300 W Xe lamp                                      | 6.5                                                 | 5                |                                      |       |
|                                                    |                                |             | Visible light ( $\lambda > 400$ nm)                | 0.18                                                |                  |                                      |       |
| Zn reduced Rutile TiO <sub>2</sub>                 | Core/shell                     | 1 wt.% Pt   | 300 W Xe lamp                                      | 6.0                                                 | 6                |                                      |       |
|                                                    |                                |             | Visible light ( $\lambda > 420$ nm)                | 0.08                                                |                  |                                      |       |
| Li-EDA treated P25                                 | Heterojunction                 | No          | 300 W Xe lamp                                      | 3.46                                                | 7                |                                      |       |
|                                                    |                                | 0.5 wt.% Pt | 300 W Xe lamp                                      | 13.89                                               |                  |                                      |       |
| Al reduced N-doped P25                             | Core/shell                     | 0.5 wt.% Pt | 300 W Xe lamp                                      | 15.0                                                | 8                |                                      |       |
|                                                    |                                |             | Visible light ( $\lambda > 400$ nm)                | 0.2                                                 |                  |                                      |       |
| Mg reduced B-N co-doped TiO <sub>2</sub>           | Core/shell                     | 1.0 wt.% Pt | 300 W Xe lamp                                      | 18.8                                                | 9                |                                      |       |
| Hydrogenated TiO <sub>2</sub>                      | Core/shell                     | 0.6% Pt     | AM 1.5 solar simulator                             | 10.0                                                | 10               |                                      |       |
| Hydrogenated F-doped TiO <sub>2</sub>              | Core/shell                     | 0.6% Pt     | AM 1.5 solar simulator                             | 3.76                                                | 11               |                                      |       |
|                                                    |                                |             |                                                    | No                                                  |                  | 150 W Xe lamp, simulated solar light | 1.56  |
|                                                    |                                |             |                                                    | Visible light ( $\lambda > 400$ nm)                 |                  | 0.38                                 |       |
|                                                    |                                |             |                                                    | 1 wt.% Pt                                           |                  | 150 W Xe lamp, simulated solar light | 11.53 |
| B-P25 NPs                                          | Order/disorder Janus structure | 1 wt.% Pt   | Visible light ( $\lambda > 400$ nm)                | 3.52                                                | <b>This work</b> |                                      |       |
|                                                    |                                |             | Visible light ( $\lambda > 400$ nm)                | 3.52                                                |                  |                                      |       |



## Reference

1. J. W. Xue, X. D. Zhu, Y. Zhang, W. D. Wang, W. Xie, J. L. Zhou, J. Bao, Y. Luo, X. Gao, Y. Wang, L. Y. Jang, S. Sun and C. Gao, *ChemCatChem*, 2016, **8**, 2010-2014.
2. K. F. Zhang, W. Zhou, L. N. Chi, X. C. Zhang, W. Y. Hu, B. J. Jiang, K. Pan, G. H. Tian and Z. Jiang, *ChemSusChem*, 2016, **9**, 2841-2848.
3. F. Xiao, W. Zhou, B. J. Sun, H. Z. Li, P. Z. Qiao, L. P. Ren, X. J. Zhao and H. G. Fu, *Sci. China-Mater.*, 2018, **61**, 822-830.
4. Z. Zhao, X. Y. Zhang, G. Q. Zhang, Z. Y. Liu, D. Qu, X. Miao, P. Y. Feng and Z. C. Sun, *Nano Research*, 2015, **8**, 4061-4071.
5. H. Tan, Z. Zhao, M. Niu, C. Mao, D. Cao, D. Cheng, P. Feng and Z. Sun, *Nanoscale*, 2014, **6**, 10216-10223.
6. Z. Zhao, H. Q. Tan, H. F. Zhao, Y. Lv, L. J. Zhou, Y. J. Song and Z. C. Sun, *Chem. Commun.*, 2014, **50**, 2755-2757.
7. K. Zhang, L. Wang, J. K. Kim, M. Ma, G. Veerappan, C.-L. Lee, K.-j. Kong, H. Lee and J. H. Park, *Energy Environ. Sci.*, 2016, **9**, 499-503.
8. T. Lin, C. Yang, Z. Wang, H. Yin, X. Lü, F. Huang, J. Lin, X. Xie and M. Jiang, *Energy Environ. Sci.*, 2014, **7**, 967-972.
9. Y. Li, R. Fu, M. Gao and X. Wang, *Int. J. Hydrogen Energy*, 2019, **44**, 28629-28637.
10. X. Chen, L. Liu, Y. Y. Peter and S. S. Mao, *Science*, 2011, **331**, 746-750.
11. Q. Gao, F. Si, S. Zhang, Y. Fang, X. Chen and S. Yang, *Int. J. Hydrogen Energy*, 2019, **44**, 8011-8019.
